# Supplementary material for: Silver particle-loaded nickel oxide nanosheet arrays on nickel foam as advanced binder-free electrodes for aqueous asymmetric supercapacitors
Source: Royal Society of Chemistry journal article supplement (doi:10.1039/c7ra06252d), 2017-01-01
Supplement: c7ra06252d1.pdf [file c7ra06252d1.pdf]

**Silver particle-loaded nickel oxide nanosheet arrays on nickel foam as advanced binder-free electrodes for aqueous asymmetric supercapacitors**

Shuxing Wu,<sup>a</sup> Kwan San,<sup>b</sup> Kwun Nam Hui,<sup>c</sup> Je Moon Yun<sup>d</sup> and Kwang Ho Kim<sup>\*ad</sup>

<sup>a</sup>School of Materials Science and Engineering, Pusan National University, San 30 Jangjeon-dong, Geumjeong-gu, Busan 609-735, Republic of Korea

<sup>b</sup>School of Mathematics, University of East Anglia, Norwich, NR4 7TJ, United Kingdom

<sup>c</sup>Institute of Applied Physics and Materials Engineering, University of Macau, Avenida da Universidade, Macau, China

<sup>d</sup>Global Frontier R&D Center for Hybrid Interface Materials, Pusan National University, 30 Jangjeon-dong, Geumjeong-gu, Busan 609-735, South Korea

*\*Corresponding author:*

E-mail: [kwhokim@pusan.ac.kr](mailto:kwhokim@pusan.ac.kr) (Kwang Ho Kim)

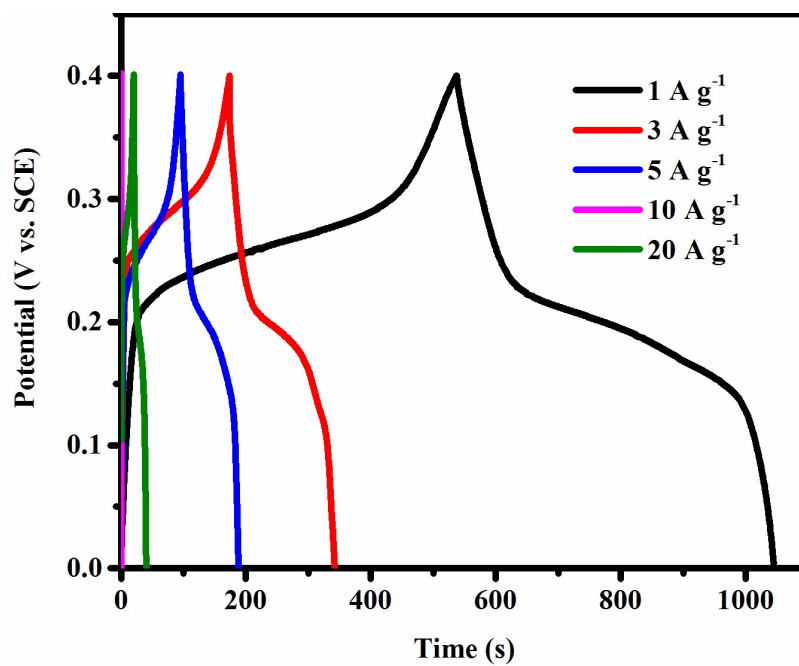

**Fig. S1** GCD curves of NiO/NF at various current densities.

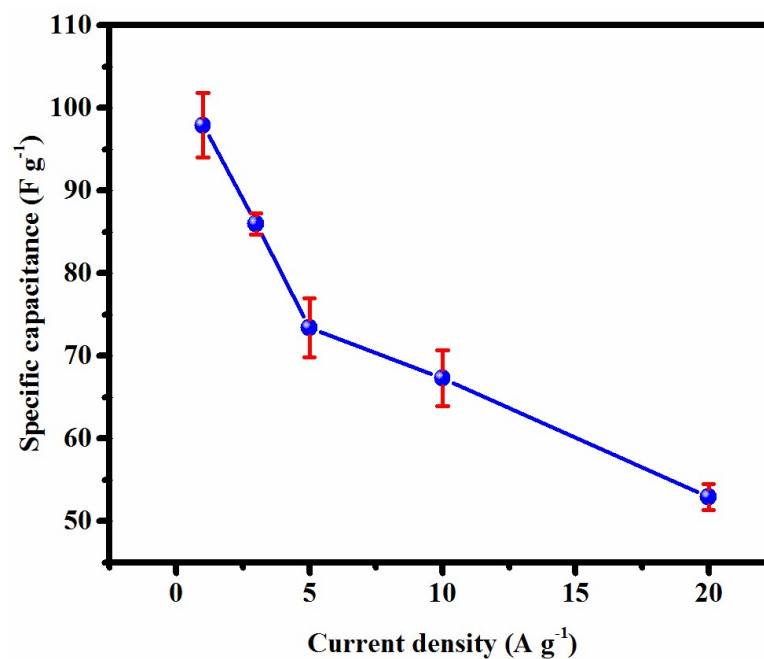

**Fig. S2** Rate capability at various current densities ranging from 1 A g<sup>-1</sup> to 20 A g<sup>-1</sup>.
